# Supplementary material for: Authentication of the Origin, Variety and Roasting Degree of Coffee Samples by Non-Targeted HPLC-UV Fingerprinting and Chemometrics. Application to the Detection and Quantitation of Adulterated Coffee Samples
Source: PubMed Central journal article supplement (PMC7142590; doi:10.3390/foods9030378), 2020-03-24
Supplement: foods-09-00378-s001.pdf [file foods-09-00378-s001.pdf]

## Supplementary Material

# Authentication of the Origin, Variety and Roasting Degree of Coffee Samples by Non-Targeted HPLC-UV Fingerprinting and Chemometrics. Application to the Detection and Quantitation of Adulterated Coffee Samples.

Nerea Núñez <sup>1,\*</sup>, Xavi Collado <sup>1</sup>, Clara Martínez <sup>1</sup>, Javier Saurina <sup>1,2</sup> and Oscar Núñez <sup>1,2,3,\*</sup>

<sup>1</sup> Department of Chemical Engineering and Analytical Chemistry, University of Barcelona, Martí i Franquès 1-11, E08028 Barcelona, Spain; nereant7@gmail.com (N.N.); xavi.collado08@gmail.com (X.C.); clmartig28@alumnes.ub.edu (C.M.); xavi.saurina@ub.edu (J.S.); oscar.nunez@ub.edu (O.N.)

<sup>2</sup> Research Institute in Food Nutrition and Food Safety, University of Barcelona, Recinte Torribera, Av. Prat de la Riba 171, Edifici de Recerca (Gaudí), Santa Coloma de Gramenet, E08921 Barcelona, Spain

<sup>3</sup> Serra Húnter Fellow, Generalitat de Catalunya, Rambla de Catalunya 19-21, E08007 Barcelona, Spain

\* Correspondence: nereant7@gmail.com (N.N.); oscar.nunez@ub.edu (O.N.); Tel.: +34-93-403-3706

**Table S1.** Polyphenol and phenolic acid compounds used for optimizing the HPLC-UV separation.

| Peak | Compound             | Family        | CAS Number  | Structure                                                                             |
|------|----------------------|---------------|-------------|---------------------------------------------------------------------------------------|
| 1    | Homogentisic acid    | Phenolic acid | 451-13-8    | 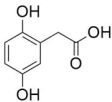 |
| 2    | (+)-Catechin hydrate | Flavanol      | 225937-10-0 |  |
| 3    | Homovanillic acid    | Phenolic acid | 306-08-1    |  |
| 4    | Chlorogenic acid     | Phenolic acid | 327-97-9    |  |
| 5    | Caffeic acid         | Phenolic acid | 331-39-5    |  |

|    |                         |                   |            |                                                                                       |
|----|-------------------------|-------------------|------------|---------------------------------------------------------------------------------------|
| 6  | <b>Syringic acid</b>    | Phenolic acid     | 530-57-4   | 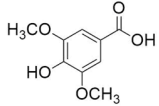   |
| 7  | <b>Vanillin</b>         | Phenolic aldehyde | 121-33-5   |    |
| 8  | <b>Syringaldehyde</b>   | Phenolic aldehyde | 134-96-3   |    |
| 9  | <b>(-)- Epicatechin</b> | Flavanol          | 490-46-0   |   |
| 10 | <b>p-Coumaric acid</b>  | Phenolic acid     | 501-98-4   |  |
| 11 | <b>Polydatin</b>        | Stillbene         | 27208-80-6 |  |
| 12 | <b>Ferulic acid</b>     | Phenolic acid     | 537-98-4   |  |
| 13 | <b>Veratric acid</b>    | Phenolic acid     | 93-07-2    |  |
| 14 | <b>Quinic acid</b>      | -                 | 77-95-2    |  |
| 15 | <b>Fisetin</b>          | Flavanol          | 528-48-3   |  |

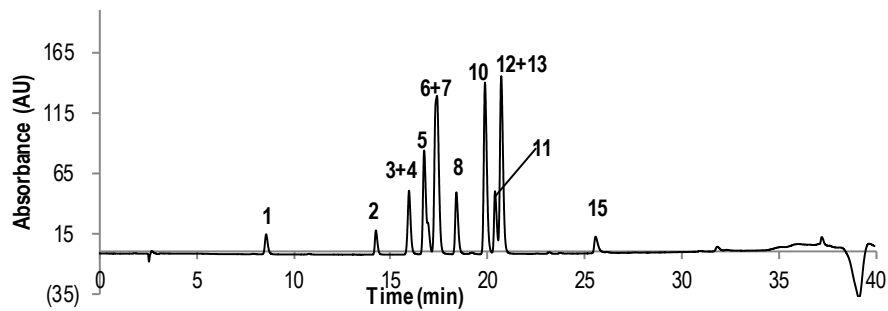

**Figure S1.** HPLC-UV chromatogram (at 280 nm) obtained with a standard solution of 15 polyphenol and phenolic acid compounds (each at 20 mg/L). Peak identification as in Table S1.

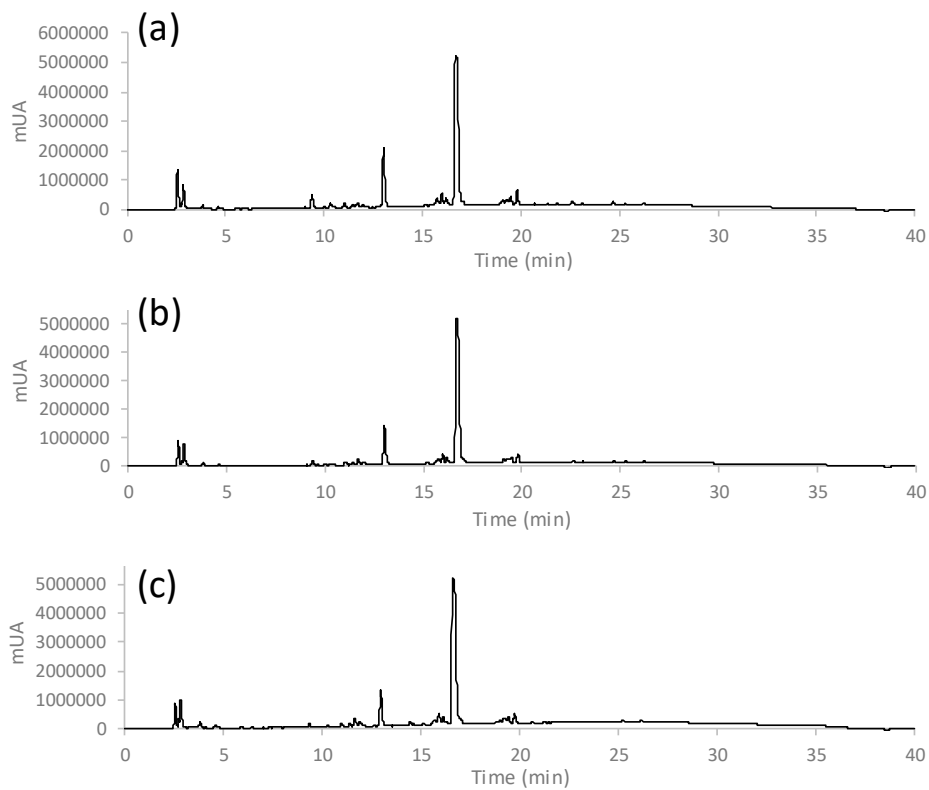

**Figure S2.** HPLC-UV Fingerprints (at 280 nm) of three coffees of the second set of samples. (a) an Arabica coffee from Colombia, (b) an Arabica coffee from Nicaragua, and (c) an Arabica-Robusta mixture coffee from an Unknown origin.

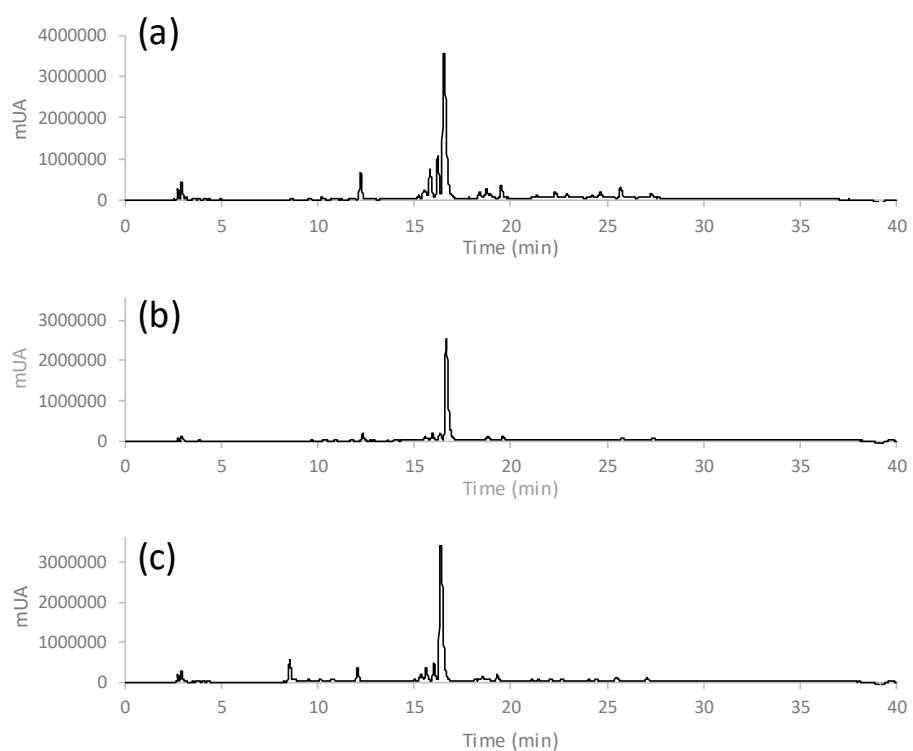

**Figure S3.** HPLC-UV Fingerprints (at 280 nm) of three coffees of the third set of samples. (a) an Arabica coffee from Vietnam, (b) a Robusta coffee from Vietnam, and (c) a coffee from Cambodia.

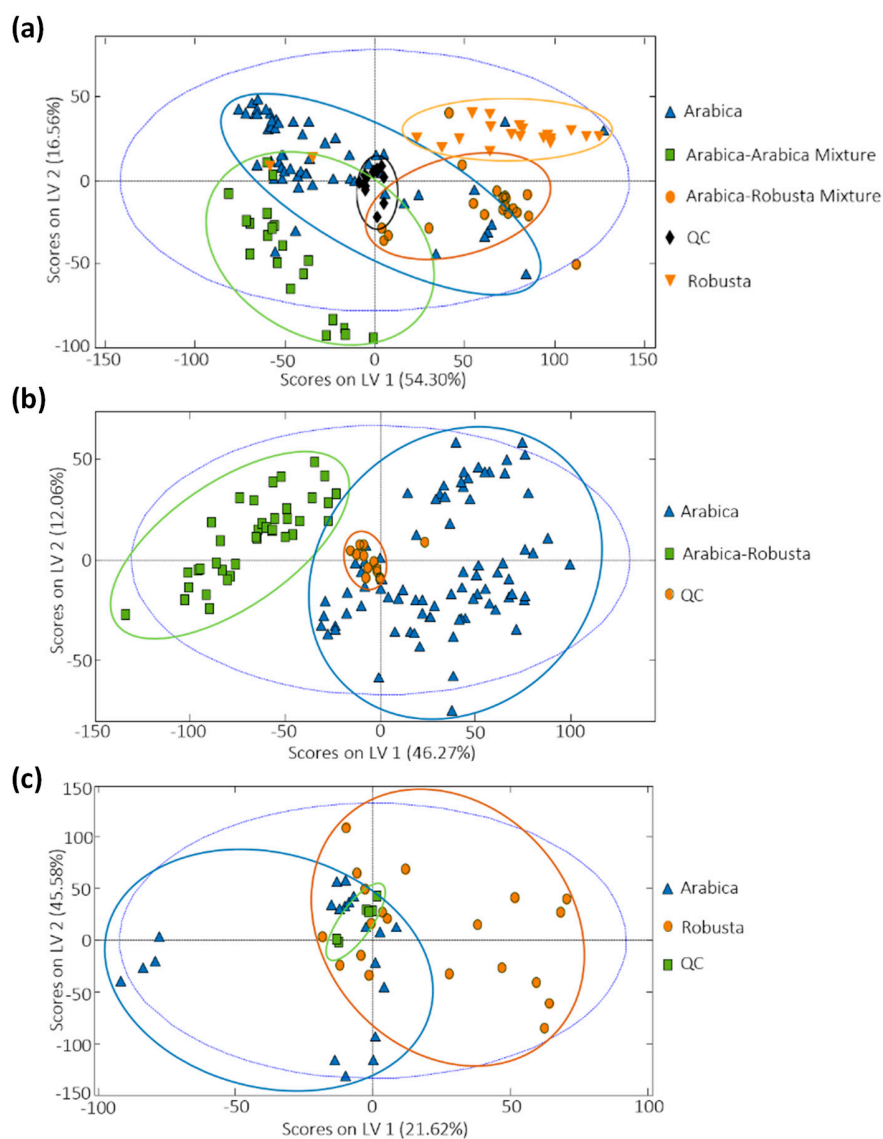

**Figure S4.** PLS-DA score plots of LV1 vs. LV2 for (a) coffee set of samples 1, (b) coffee set of samples 2, and (c) coffee set of samples 3, when using chromatographic fingerprints as chemical descriptors of coffee variety (Arabica, Robusta or mixtures). A total of 4, 2, and 2 LVs for sets 1, 2 and 3, respectively, were established.

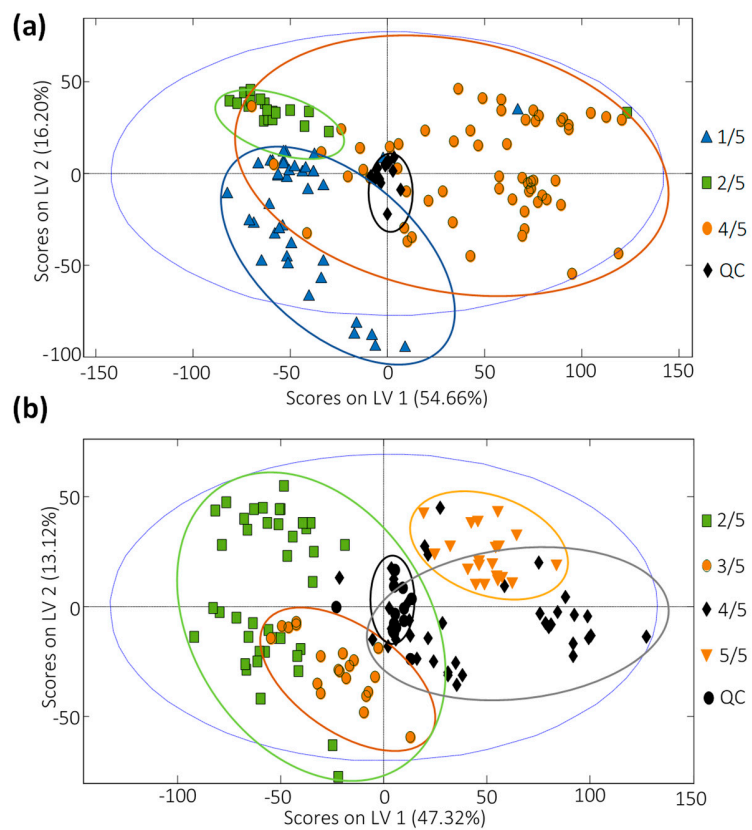

**Figure S5.** PLS-DA score plots of LV1 vs. LV2 for (a) coffee set of samples 2, and (b) coffee set of samples 3, when using chromatographic fingerprints as chemical descriptors of the coffee samples according to their roasting degree (1/5 lowest to 5/5 highest roasting degree). A total of 2 LVs for all the sample sets were established.

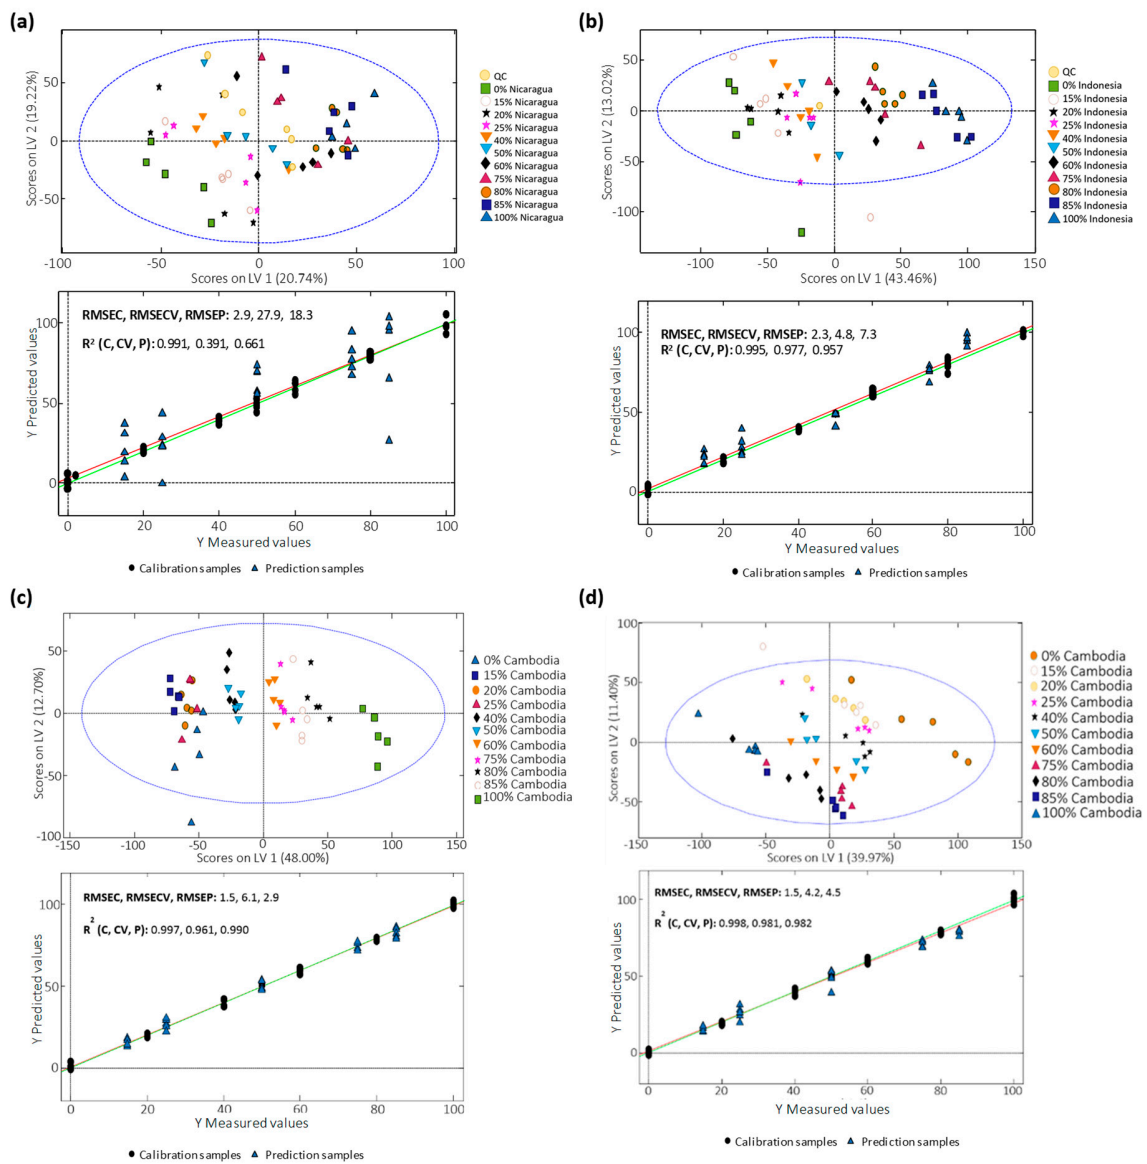

**Figure S6.** LV1 vs. LV2 score plot of the adulteration levels employed in both calibration and validation sets, and PLSR predictions for (a) Colombian coffee adulterated with Nicaraguan coffee (model with 3 LVs), (b) Indian coffee adulterated with Indonesian coffee (model with 4 LVs), (c) Vietnamese Arabica coffee adulterated with Cambodian coffee (model with 6 LVs), and (d) Vietnamese Robusta coffee adulterated with Cambodian coffee (model with 4 LVs).
